# Supplementary material for: Core–shell Mo2C@NC/Mo2C hollow microspheres as highly efficient electrocatalysts for the hydrogen evolution reaction
Source: Royal Society of Chemistry journal article supplement (doi:10.1039/d3dt00773a), 2023-01-01
Supplement: d3dt00773a1.pdf [file d3dt00773a1.pdf]

## **Core-shell Mo<sub>2</sub>C@NC/Mo<sub>2</sub>C hollow microspheres as highly-efficient electrocatalyst for hydrogen evolution reaction**

Xuefei Zhang,<sup>a,b</sup> Tao Lei,<sup>a</sup> Miao Xia,<sup>a</sup> and Qiao-Hua Wei<sup>\*a</sup>, Zailai Xie<sup>\*a</sup>

<sup>a</sup> *Fujian Provincial Key Laboratory of Electrochemical Energy Storage Materials and Fujian Provincial Key Laboratory of Advanced Inorganic Oxygenated Materials, Fuzhou University, Fuzhou 350016, China. Email: qhwei76@fzu.edu.cn; zlxie@fzu.edu.cn*

<sup>b</sup> *College of Chemical Engineering, Fuzhou University, Fuzhou 350016, China.*

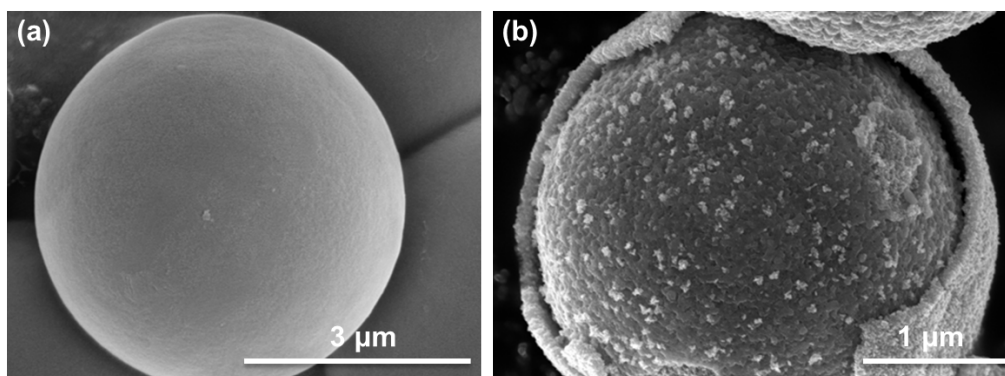

**Figure S1.** Field emission scanning electron microscopy (FESEM) images for (a)  $\text{MoO}_2\text{@HTC/MoO}_2\text{-2}$  and  $\text{MoO}_2\text{@HTC/MoO}_2\text{-12}$  samples, respectively.

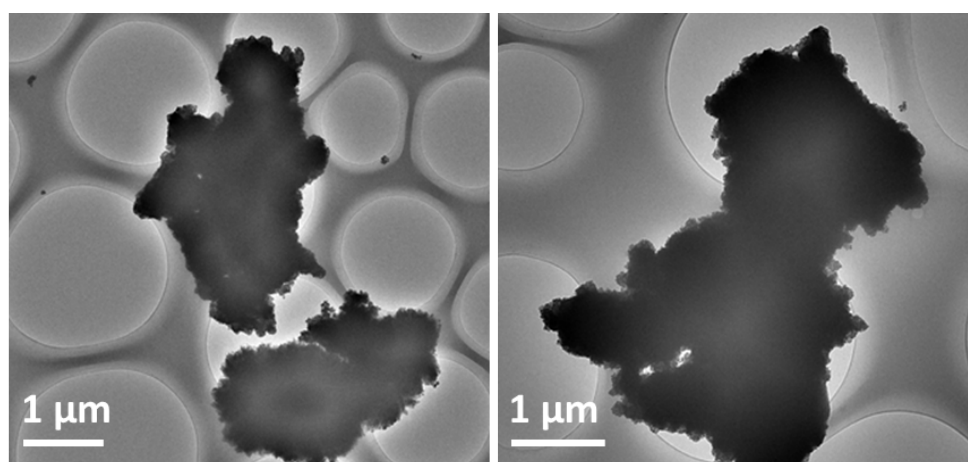

**Figure S2.** TEM images of  $\text{MoO}_2\text{@HTC/MO}_2\text{-12-no}$  with absence of  $\text{H}_2\text{SO}_4$ .

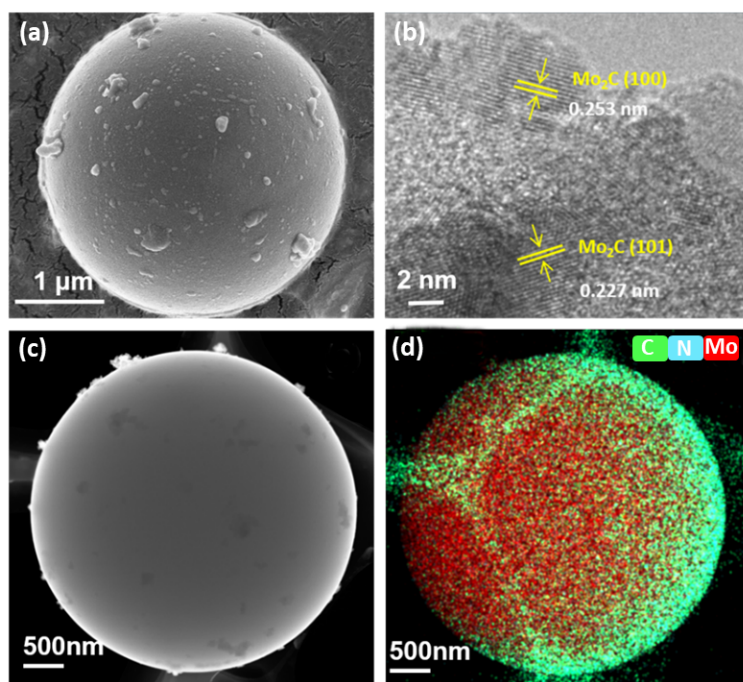

**Figure S3.** (a) SEM image of  $\text{Mo}_2\text{C}@NC/\text{Mo}_2\text{C}-2$ , (b) HRTEM image, (c) STEM image, (d) The corresponding C+N+Mo mapping images for  $\text{Mo}_2\text{C}@NC/\text{Mo}_2\text{C}-2$  sample.

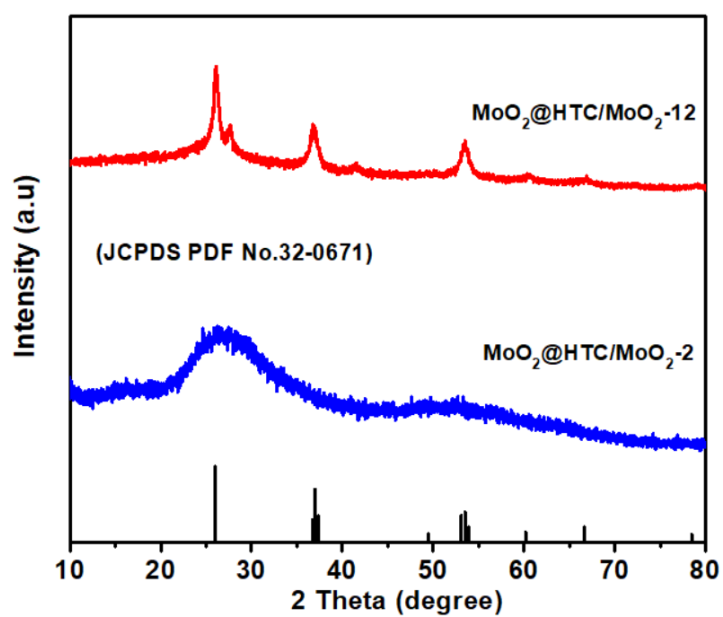

**Figure S4.** Powder X-ray diffraction patterns for  $\text{MoO}_2@HTC/\text{MoO}_2-2$  and  $\text{MoO}_2@HTC/\text{MoO}_2-12$  samples.

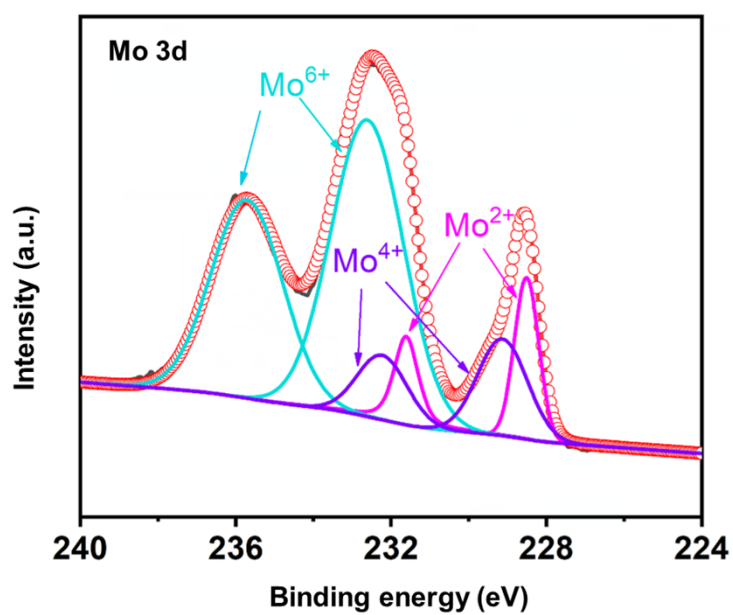

Figure S5. Mo 3d XPS of Mo<sub>2</sub>C@NC/Mo<sub>2</sub>C-2 sample.

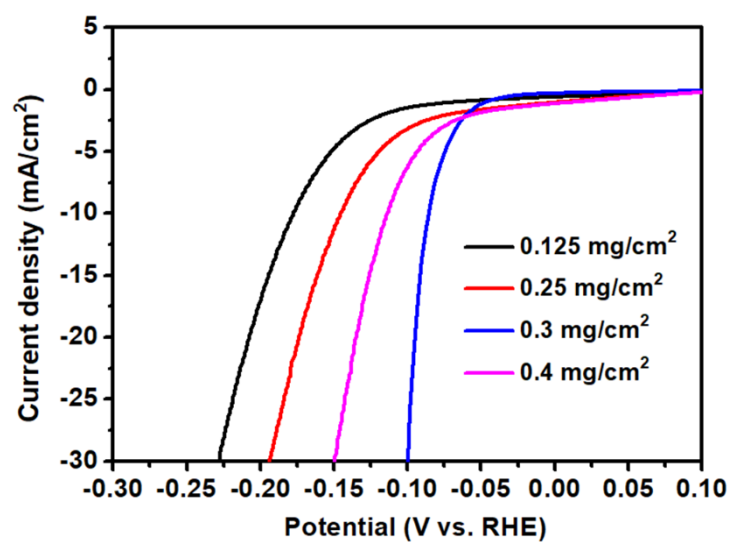

Figure S6. Polarization curves in 1 M KOH aqueous media on Mo<sub>2</sub>C@NC/Mo<sub>2</sub>C-12 samples with different loading amounts.

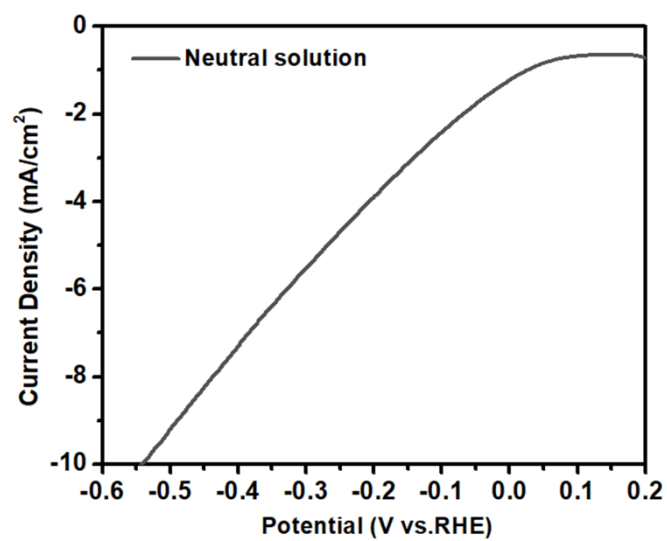

**Figure S7.** Polarization curves in neutral solution on Mo<sub>2</sub>C@NC/Mo<sub>2</sub>C-12 samples.

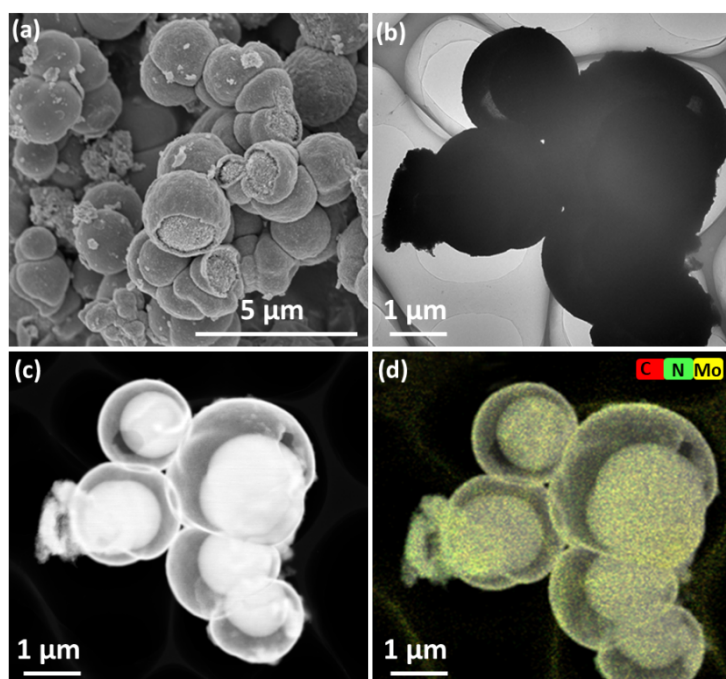

**Figure S8.** (a) SEM image of Mo<sub>2</sub>C@NC/Mo<sub>2</sub>C-6, (b) TEM image, (c) and (d) HAADF-STEM image and corresponding mapping images of the Mo<sub>2</sub>C@NC/Mo<sub>2</sub>C-6 sample.

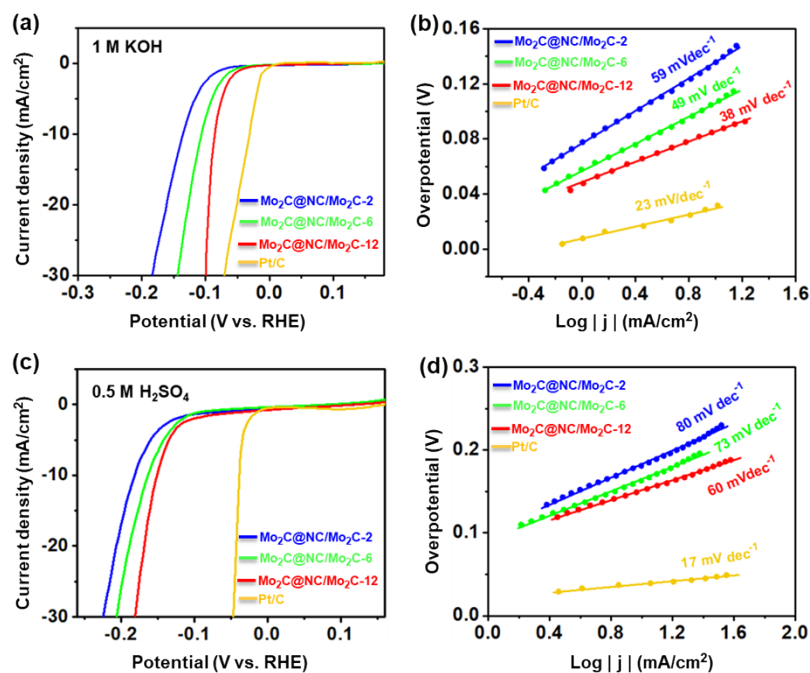

**Figure S9.** (a) Polarization curves in 1 M KOH aqueous media on Mo<sub>2</sub>C@NC/Mo<sub>2</sub>C-t samples, and (b) Corresponding Tafel plots, (c) Polarization curves in 0.5 M H<sub>2</sub>SO<sub>4</sub> aqueous media, and (d) Corresponding Tafel plots.

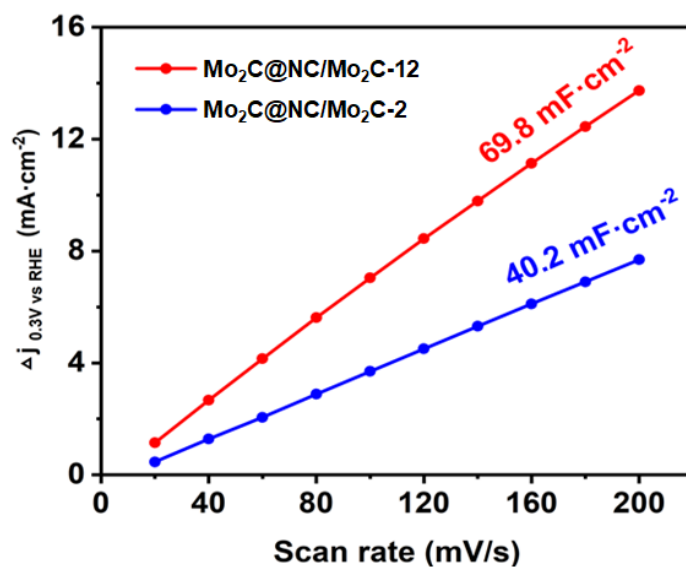

**Figure S10.** Capacitive currents at 0.45 V as a function of the scan rate for different catalysts in 1 M KOH solution.

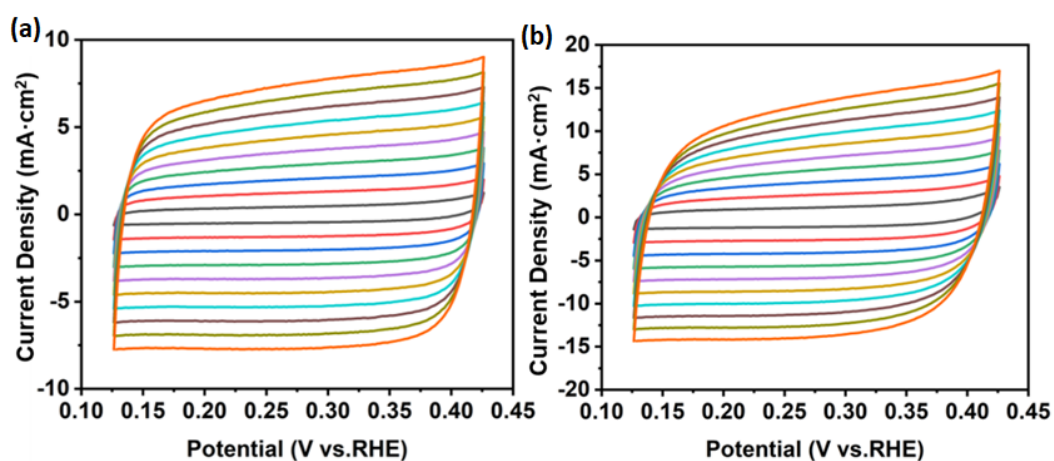

**Figure S11.** The cyclic voltammetry curve in the sweep speed range of 20 mV-200 mV for (a) Mo<sub>2</sub>C@NC/Mo<sub>2</sub>C-2, and (b) Mo<sub>2</sub>C@NC/Mo<sub>2</sub>C-12 sample.

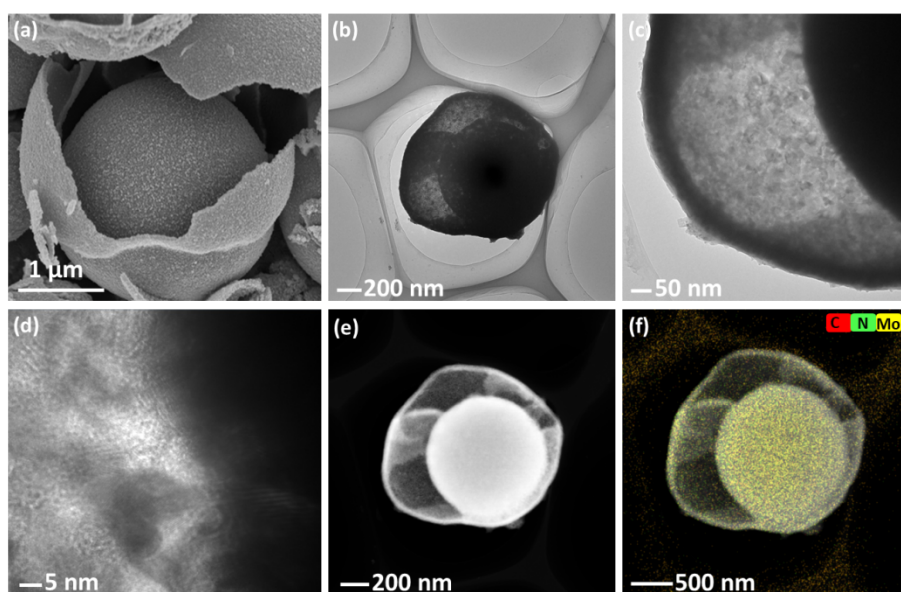

**Figure S12.** (a) SEM image of spent Mo<sub>2</sub>C@NC/Mo<sub>2</sub>C-12, (b) TEM image, (c) and (d) HRTEM images, (e) HAADF-STEM image, (f) The corresponding mapping images of spent Mo<sub>2</sub>C@NC/Mo<sub>2</sub>C-12 sample.
